# Supplementary material
Source: PubMed Central journal article supplement (PMC6591762)
Supplement: Supplemental_Material6.pdf [file Supplemental_Material6.pdf]

## **Supplement:**

We would like to thank all the members of the participating neurological and neurosurgical departments, especially:

Aachen, Universitätsklinikum Aachen, J. Schiefer

Bad Neustadt, Neurologische Klinik Bad Neustadt, H. Soda

Berlin, Charité - Centrum für Schlaganfallforschung Berlin, G. Häusler

Berlin, Vivantes Klinikum Neukölln - Neurozentrum, D. Nabavi

Bielefeld, Evangelisches Krankenhaus Bielefeld, W. Schäbitz

Dresden, Klinik und Poliklinik für Neurologie - Klinikum Carl Gustav Carus Dresden, K.

Barlinn

Düsseldorf, Universitätsklinikum Düsseldorf - Neurologische Klinik, S. Jander

Essen, Alfried Krupp Krankenhaus – Klinik für Neurologie, J. Hadisurya

Essen, Universitätsklinikum Essen - Neurologische Universitätsklinik, C. Kleinschnitz

Frankfurt, Krankenhaus Nordwest – Neurologische Klinik, M. Lorenz

Frankfurt, Universitätsklinikum Frankfurt, W. Pfeilschifter

Gießen, Universitätsklinikum Standort Gießen - Klinik und Poliklinik für Neurologie, C.

Tanislav

Greifswald, Universitätsmedizin Greifswald- Klinik und Poliklinik für Neurologie, B. Gaida

Halle, Krankenhaus Martha-Maria Halle -Klinik für Neurologie, F. Hoffmann

Halle, Martin-Luther-Universität Halle-Wittenberg - Klinik für Neurologie, K. Wartenberg

Hamburg, Asklepios Klinik Altona – Neurologie, J. Röther

Hamburg, Asklepios Klinik Wandsbek – Neurologie, L. Marquardt

Hamburg, Universitätsklinikum Hamburg-Eppendorf - Klinik und Poliklinik für Neurologie,  
G. Thomalla

Hannover, Medizinische Hochschule Hannover, K. Weißenborn

Heidelberg, Universitätsklinik Heidelberg - Neurologische Klinik, T. Rizos

Heilbronn, SLK Heilbronn – Klinik für Neurologie, C. Opherk

Herne, EvK Herne, T. Höhle

Jena, Universitätsklinikum Jena – Hans-Berger-Klinik für Neurologie, A. Günther

Karlsruhe, Klinikum Karlsruhe, F. Meisel

Kiel, Klinik für Neurologie - Campus Kiel - Universitätsklinikum Schleswig-Holstein, J.  
Meyne

Leipzig, Universitätsklinikum Leipzig - Klinik für Neurologie, D. Michalski

Ludwigshafen, Klinikum Ludwigshafen - Neurologische Klinik, F. Palm

Lübeck, Klinik für Neurologie - Campus Lübeck - Universitätsklinikum Schleswig-Holstein,  
G. Roysl

Mainz, Universitätsmedizin Mainz - Klinik für Neurologie, K. Gröschel

Mannheim, Universitätsmedizin Mannheim- Neurologische Klinik, M. Fatar

Minden, Johannes Wesling Klinikum Minden - Neurologie, P. Schellinger

München, Klinikum Rechts der Isar, H. Poppert

Münster, Universitätsklinikum Münster - Klinik für Neurologie, R. Dziewas

Nürnberg, Klinik für Neurologie - Klinikum Nürnberg Süd, M. Nüchel

Sande, Nordwest Krankenhaus Sanderbusch, P. Kermer

Schweinfurt, Leopoldina Krankenhaus Schweinfurt, J. Mühler

Stuttgart, Klinikum Stuttgart - Neurologische Klinik Bürgerhospital, E. Schmid

Teupitz, Asklepios Klinik Teupitz, J. Faiss

Trier, Krankenhaus der Barmherzigen Brüder Trier, M. Maschke

Tübingen, Universitätsklinikum Tübingen - Neurologische Klinik, S. Poli

Ulm, Universitätsklinikum Ulm, K. Althaus

Wiesbaden, Dr. Horst Schmidt-Kliniken Wiesbaden, O. Singer

Würzburg, Universitätsklinikum Würzburg - Neurologische Klinik und Poliklinik, A.

Elhfnawy
